# Supplementary material
Source: HighWire-hosted journal article supplement (https://bmjopenquality.bmj.com/highwire/filestream/143197/field_highwire_adjunct_files/4/bmjoq-2021-001617supp005_data_supplement.pdf)
Supplement: bmjoq-2021-001617supp005_data_supplement.pdf [file bmjoq-2021-001617supp005_data_supplement.pdf]

**NAME**

Supplemental material BMJ Publishing Group Limited (BMJ) disclaims all liability and responsibility arising from any reliance placed on this supplemental material which has been supplied by the author(s)

**John Doe DOB : 1945**

✓

**APPT TIME****CONSENT****9AM**

✓

**ARRIVAL TIME****BRAND/DOSE#****8:45AM****P/1****VACCINE TIME****DEPARTURE TIME****8:53AM****9:08AM**
